# Supplementary material for: Modeling cadmium-induced endothelial toxicity using human pluripotent stem cell-derived endothelial cells
Source: PubMed Central journal article supplement (PMC5665915; doi:10.1038/s41598-017-13694-5), 2017-11-01

**Modeling cadmium-induced endothelial toxicity using human pluripotent stem  
cell-derived endothelial cells**

Ling Tang<sup>1,2+</sup>, Jun su<sup>1,2+</sup>, Ping Liang<sup>1,2,\*</sup>

<sup>1</sup>Key Laboratory of combined Multi-organ Transplantation, Ministry of Public Health,  
the First Affiliated Hospital, Zhejiang University, 310003, Hangzhou, China

<sup>2</sup>Institute of Translational Medicine, Zhejiang University, 310029, Hangzhou, China

**\*Correspondence:** Ping Liang, MD, PhD, 268 Kaixuan Road, North Block of the  
Central Building, Room 404, Hangzhou, China 310029. Phone: 86-571-86971872,

E-mail: [pingliang@zju.edu.cn](mailto:pingliang@zju.edu.cn)

<sup>+</sup>These authors contributed equally to this work

## SUPPLEMENTAL FIGURE LEGENDS

**Supplemental Figure 1.** Pluripotent staining of H9 hESCs using OCT4 (Green), SOX2 (Red), NANOG (Green) and SSEA4 (Red). DAPI indicates nuclear staining (Blue). Scale bar, 100  $\mu$ m.

**Supplemental Figure 2.** Representative images of morphological changes in H9-ECs induced by 30  $\mu$ M and 100  $\mu$ M CdCl<sub>2</sub> for 24 h. Scale bar, 200  $\mu$ m.

**Supplemental Figure 3.** Representative confocal images of TUNEL and DAPI staining in control and CdCl<sub>2</sub>-treated (0.1-100  $\mu$ M) H9-ECs. Scale bar, 200  $\mu$ m.

**Supplemental Figure 4.** Full-length blots of Caspase 3 expression in control and CdCl<sub>2</sub>-treated H9-ECs. Red boxes indicate the cropped blots shown in **Figure 3A**.

**Supplemental Figure 5.** Full-length blots of Caspase 9 expression in control and CdCl<sub>2</sub>-treated H9-ECs. Red boxes indicate the cropped blots shown in **Figure 3B**.

**Supplemental Figure 6.** Full-length blots of Bax expression in control and CdCl<sub>2</sub>-treated H9-ECs. Red boxes indicate the cropped blots shown in **Figure 3C**.

**Supplemental Figure 7.** Full-length blots of Bcl2 expression in control and CdCl<sub>2</sub>-treated H9-ECs. Red boxes indicate the cropped blots shown in **Figure 3D**.

**Supplemental Figure 8.** Full-length blots of Bax-Mitochondria and Bax-cytosol expression in control and CdCl<sub>2</sub>-treated H9-ECs. Red boxes indicate the cropped blots shown in **Figure 3E**.

**Supplemental Figure 9.** Full-length blots of Cytochrome c-cytosol and Cytochrome c-Mitochondria expression in control and CdCl<sub>2</sub>-treated H9-ECs. Red boxes indicate the cropped blots shown in **Figure 3F**.

**Supplemental Figure 10.** Comparison of cell cycle and apoptosis between control and CdCl<sub>2</sub>-treated H9-ECs.

**Supplemental Figure 11. Upper panel,** representative images of tube formation on matrigel in control and 30 μM CdCl<sub>2</sub>-treated H9-ECs assessed at 6 h. **Lower panel,** inverted images (black and white) to enhance the clarity of the representative figures in **Upper panel** using Adobe Photoshop. Scale bar, 200 μm.

**Supplemental Figure 12. A and B. Upper panel,** representative images of wound closure in control and 30 μM CdCl<sub>2</sub>-treated H9-ECs assessed at 12 h. **Lower panel,** inverted images (black and white) to enhance the clarity of the representative figures in **Upper panel** using Adobe Photoshop. Scale bar, 200 μm.

**Supplemental Figure 13.** Bar graph to compare cell proliferation between control and CdCl<sub>2</sub>-treated cells.

**Supplemental Figure 14.** A panel of most enriched GO analysis of three ontologies including biological process, cellular component, and molecular function.

**Supplemental Figure 15.** Representative confocal images showing the rescuing effect of CdCl<sub>2</sub>-induced apoptosis in H9-ECs by a panel of inhibitors to block ERK, P38, JNK, Wnt and ErbB, respectively.

**Supplemental Figure 16. Upper panel,** representative confocal images showing the rescuing effect of CdCl<sub>2</sub>-induced tube formation dysfunction phenotype in H9-ECs by a panel of inhibitors to block ERK, P38, Wnt and ErbB, respectively. **Lower panel,** inverted images (black and white) to enhance the clarity of the representative figures in **Upper panel** using Adobe Photoshop. Scale bar, 200 μm.

**Supplemental Figure 17. A and B. Upper panel,** representative confocal images showing the rescuing effect of CdCl<sub>2</sub>-induced migration dysfunction phenotype in H9-ECs by a panel of inhibitors to block ERK, P38, Wnt and ErbB, respectively. **Lower panel,** inverted images (black and white) to enhance the clarity of the representative figures in **Upper panel** using Adobe Photoshop. Scale bar, 200 μm.

**Supplemental Figure 18.** Full-length blots of p-ERK expression in control and CdCl<sub>2</sub>-treated H9-ECs. Red boxes indicate the cropped blots shown in **Figure 9A**.

**Supplemental Figure 19.** Full-length blots of p-P38 expression in control and CdCl<sub>2</sub>-treated H9-ECs. Red boxes indicate the cropped blots shown in **Figure 9B**.

**Supplemental Figure 20.** Full-length blots of p-P38 expression in control H9-ECs, CdCl<sub>2</sub>-treated H9-ECs, and H9-ECs treated with CdCl<sub>2</sub> and PD0325901 (ERK inhibitor). Red boxes indicate the cropped blots shown in **Figure 9C**.

**Supplemental Figure 21.** Full-length blots of c-Myc expression in control H9-ECs, CdCl<sub>2</sub>-treated H9-ECs, and H9-ECs treated with CdCl<sub>2</sub> and SB203580 (P38 inhibitor). Red boxes indicate the cropped blots shown in **Figure 9D**.

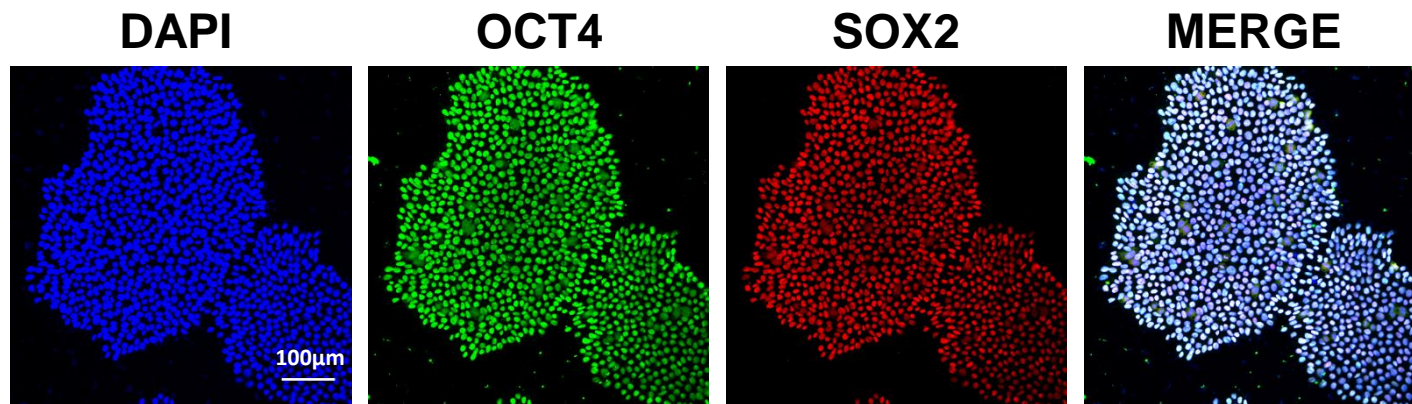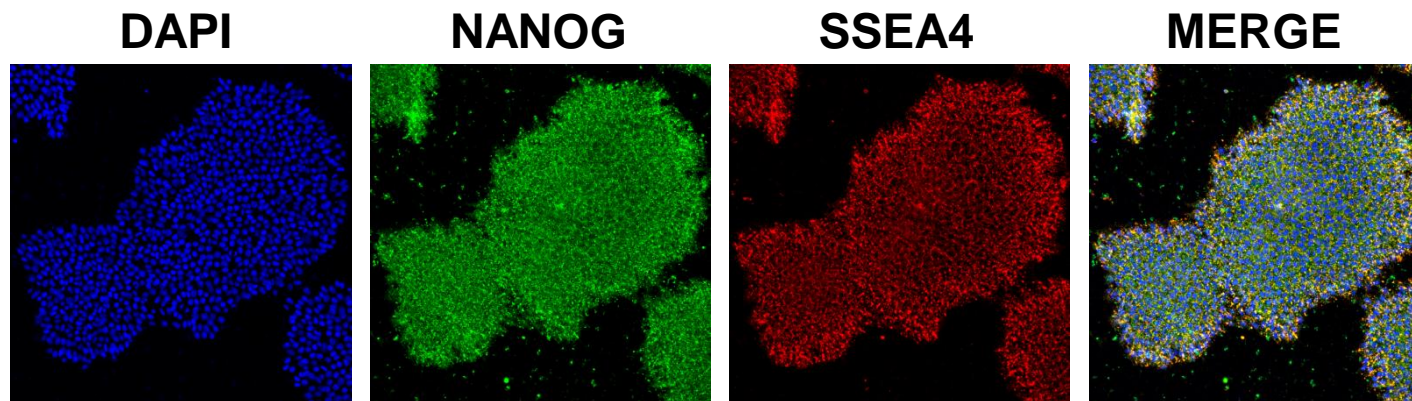

**30  $\mu\text{M}$**

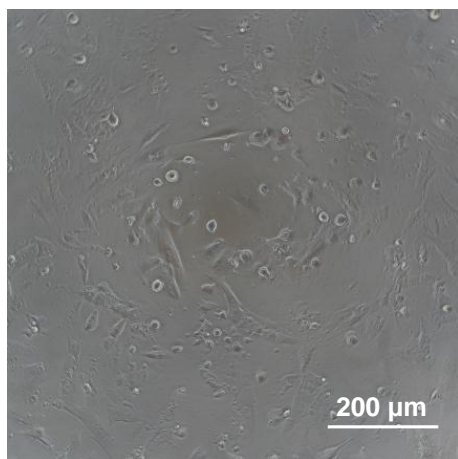

**100  $\mu\text{M}$**

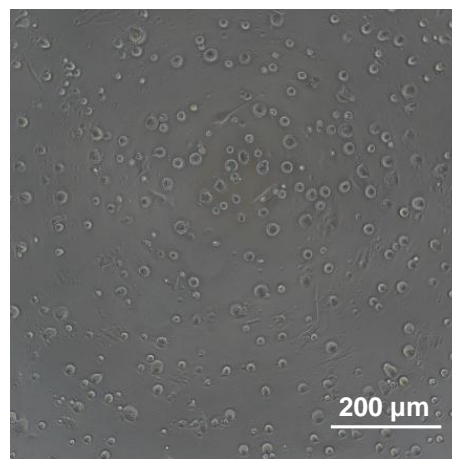

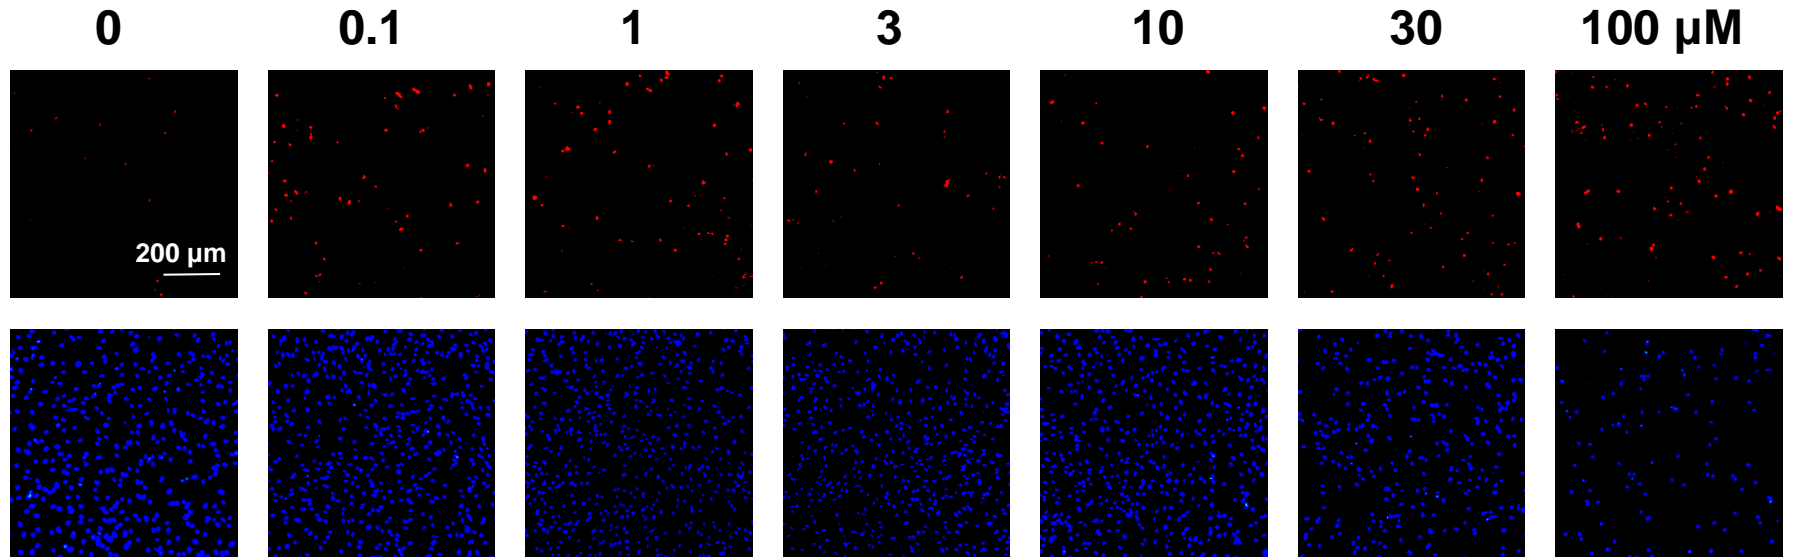

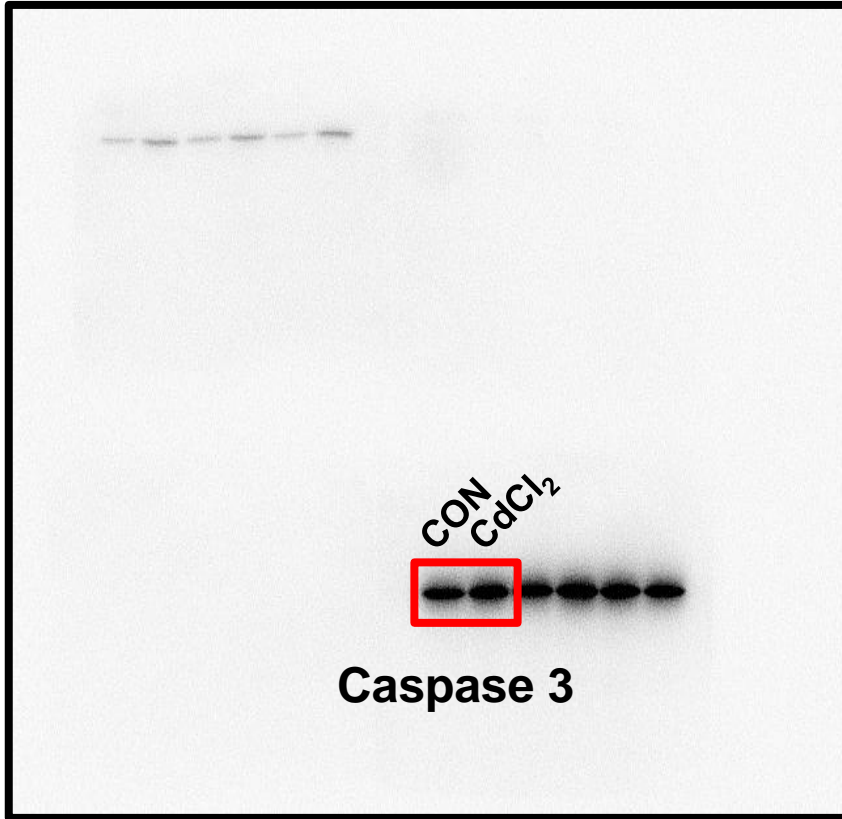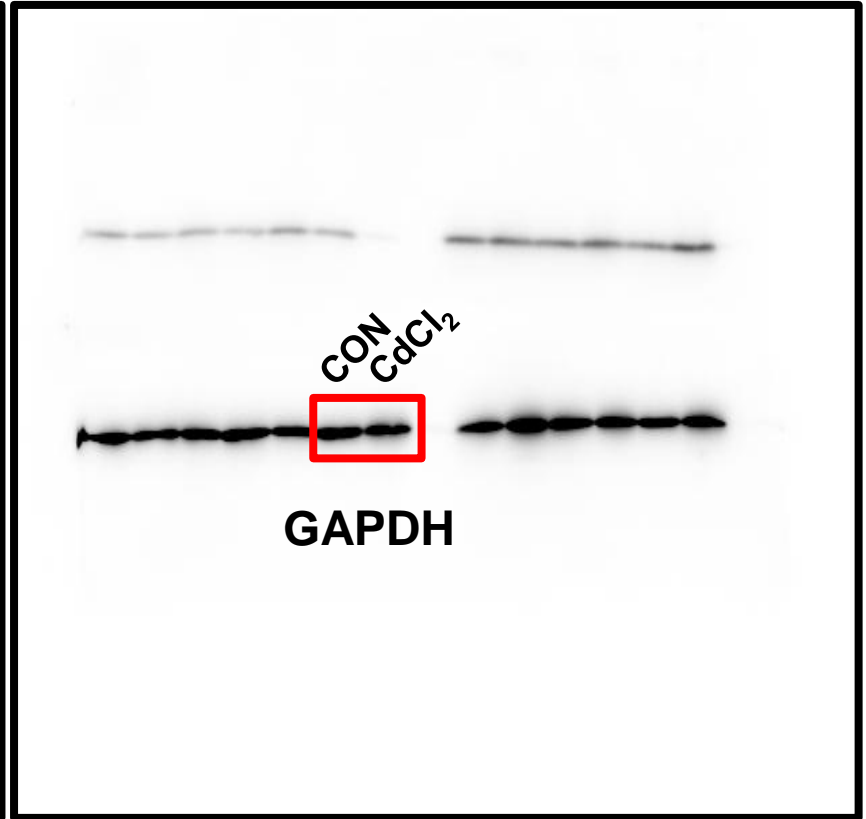



**B**

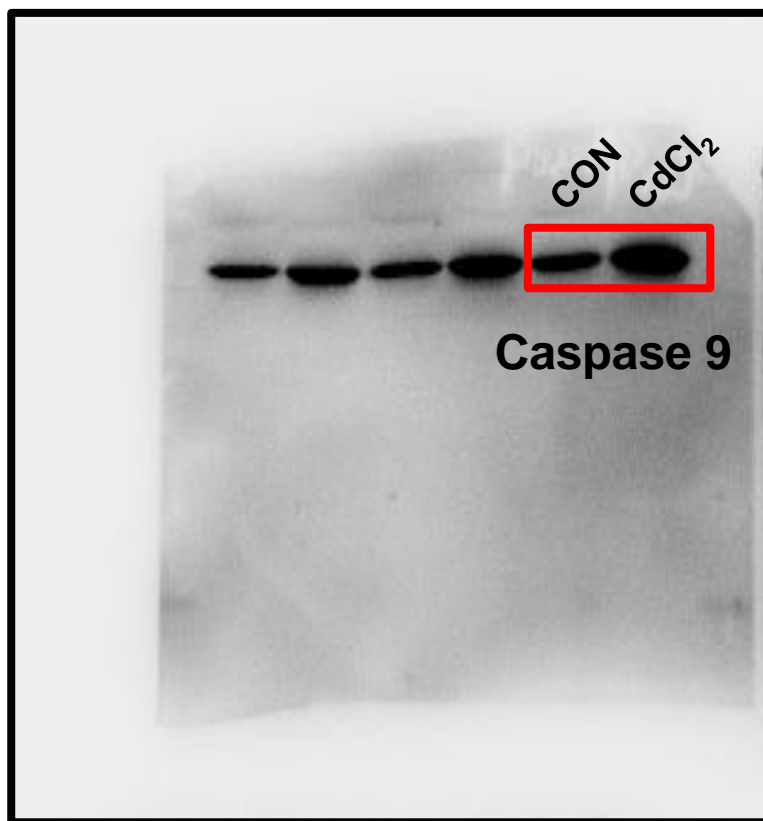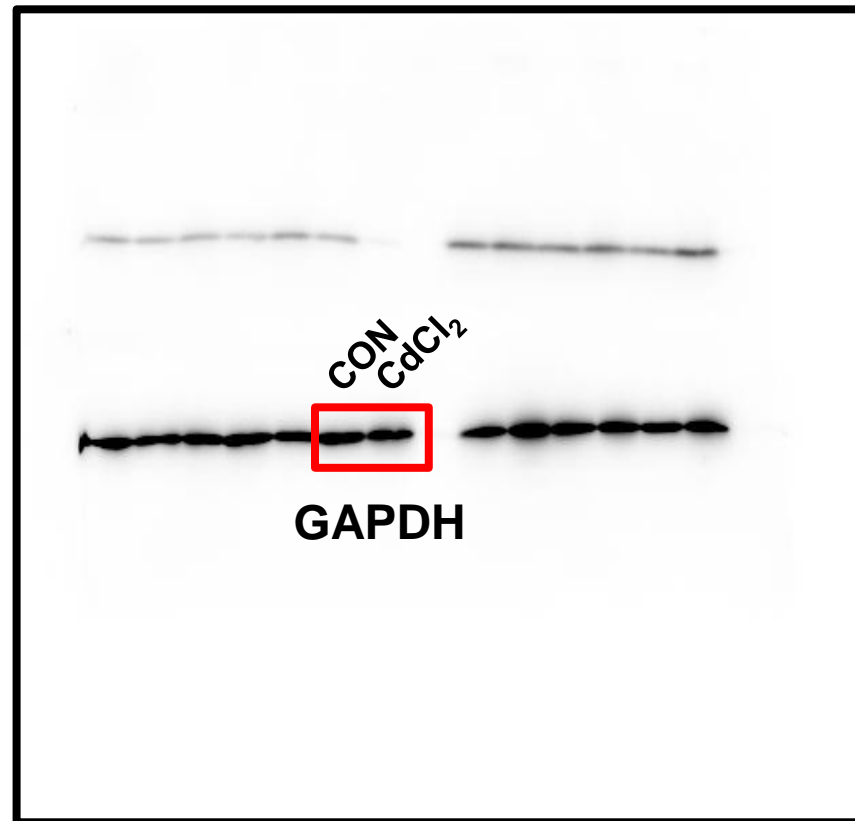

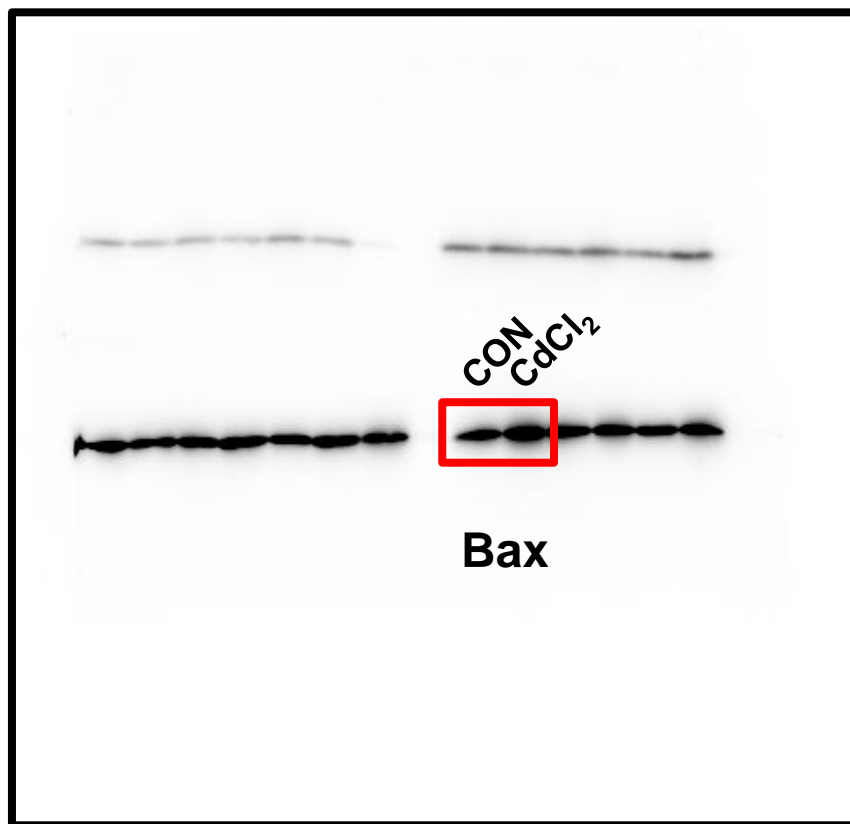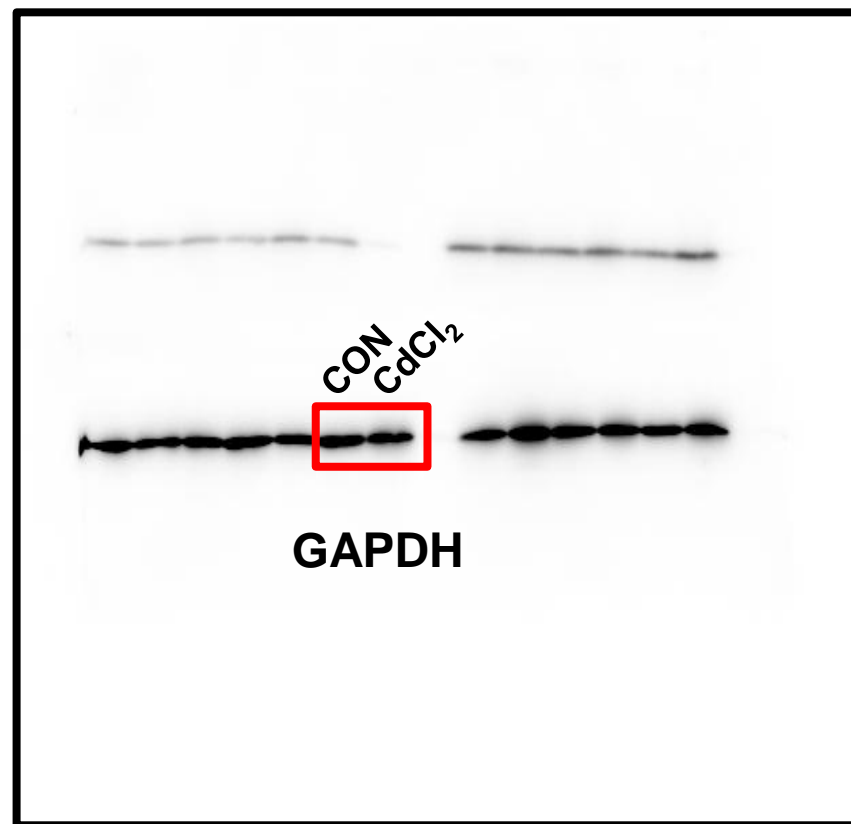

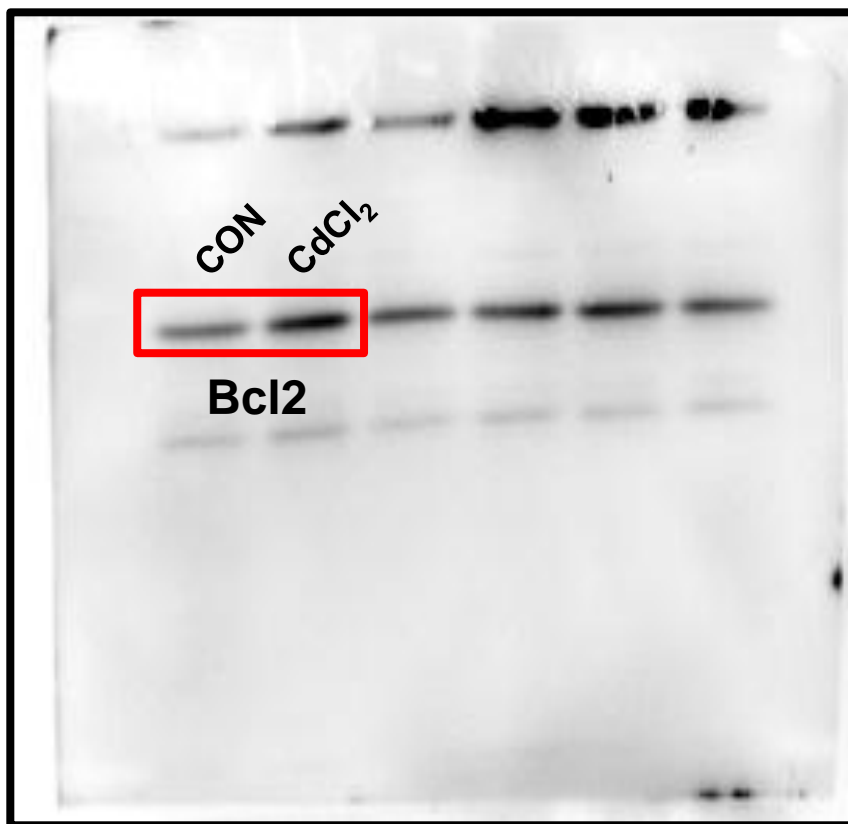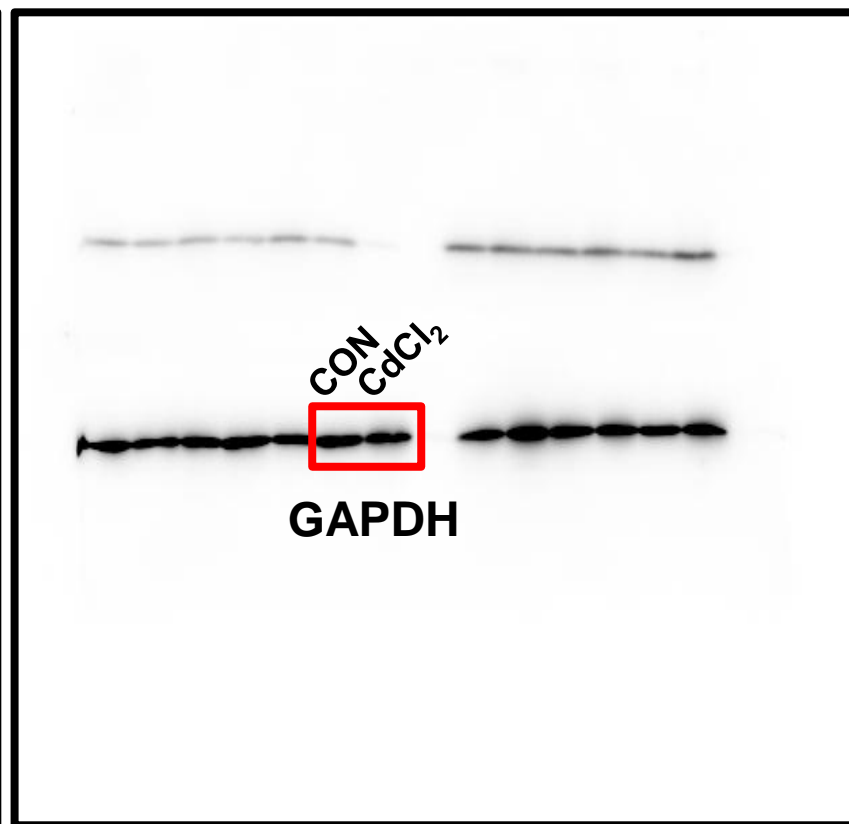

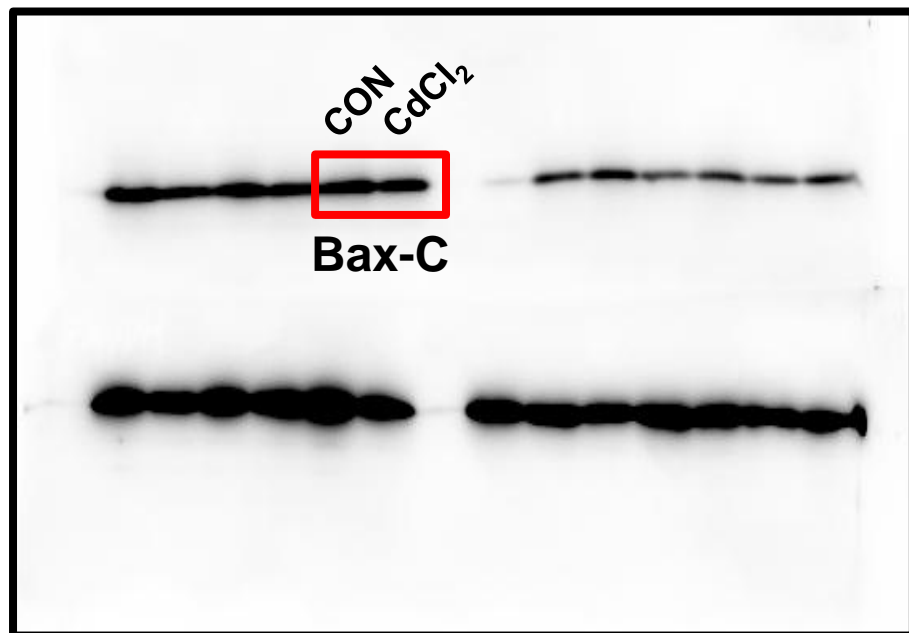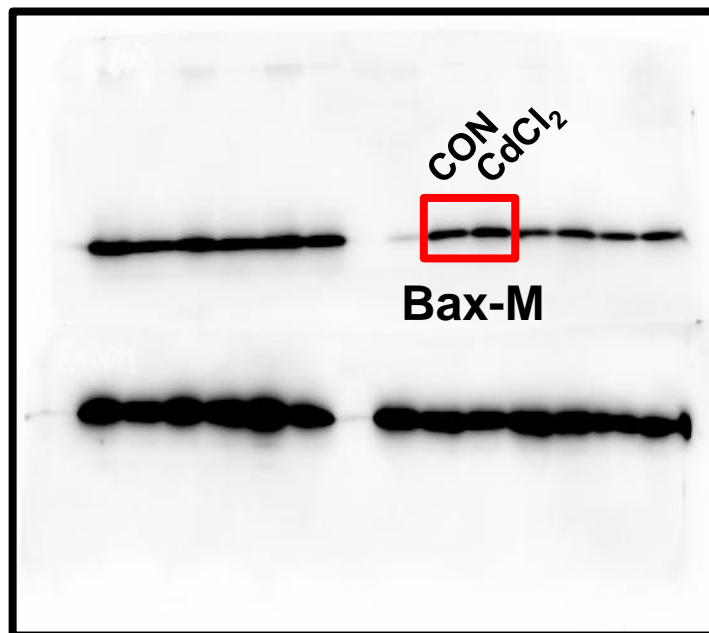

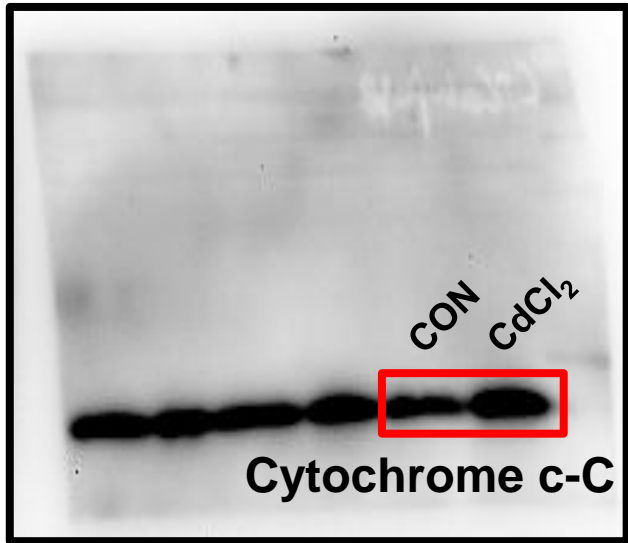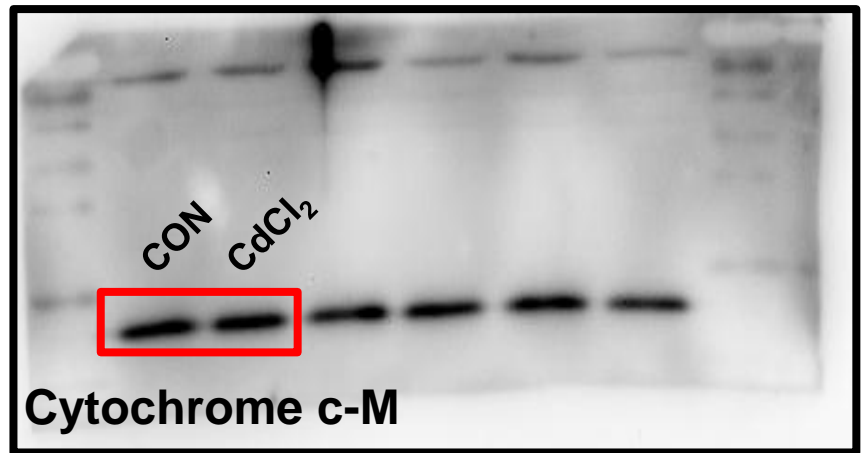

CON

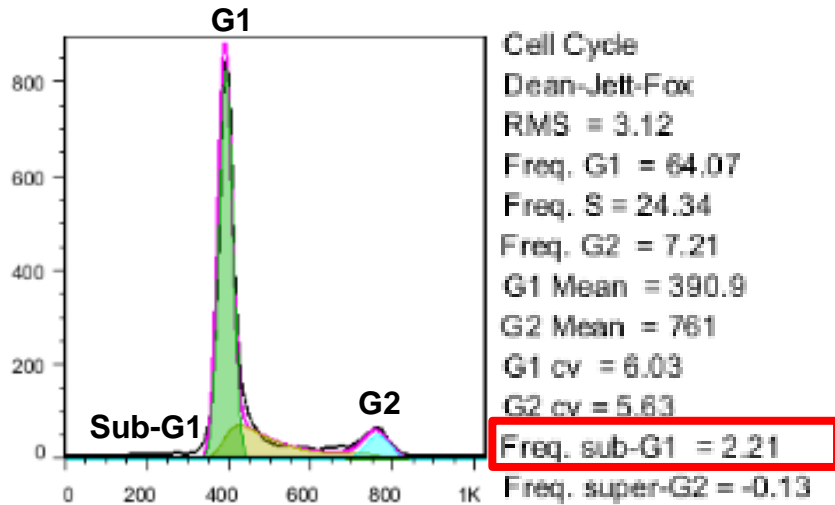

CdCl<sub>2</sub>

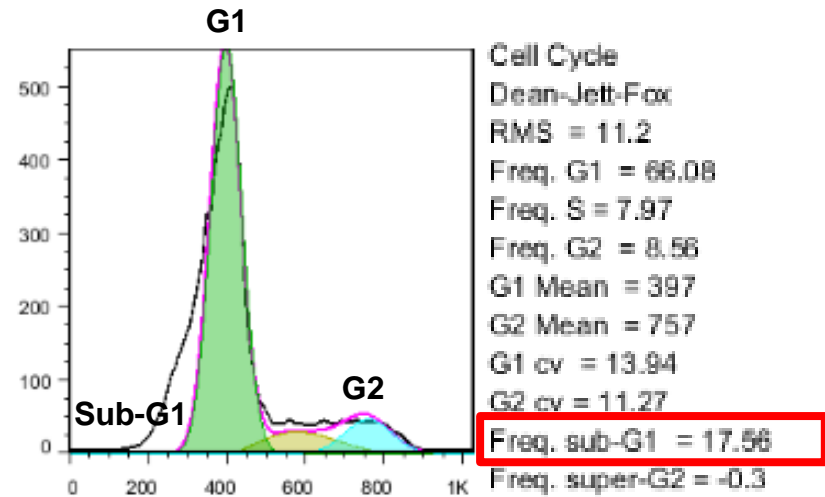

**CON**

**CdCl<sub>2</sub>**

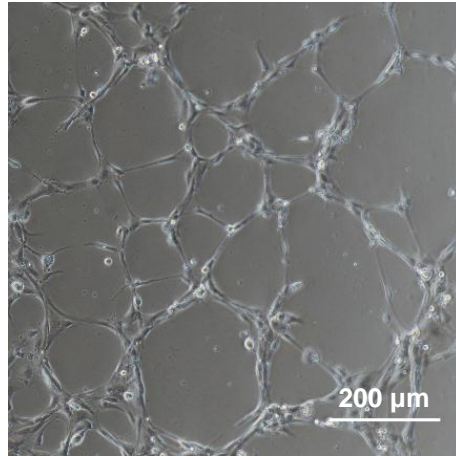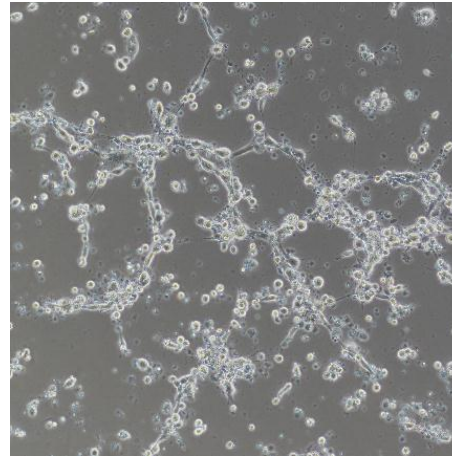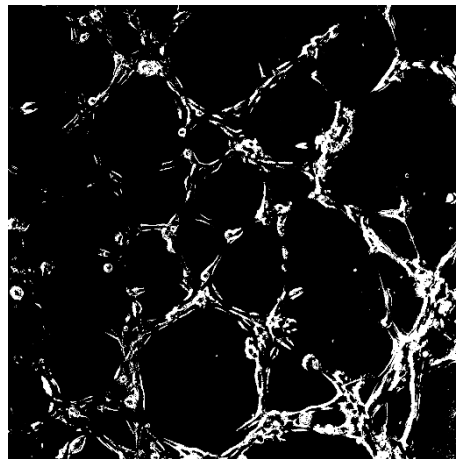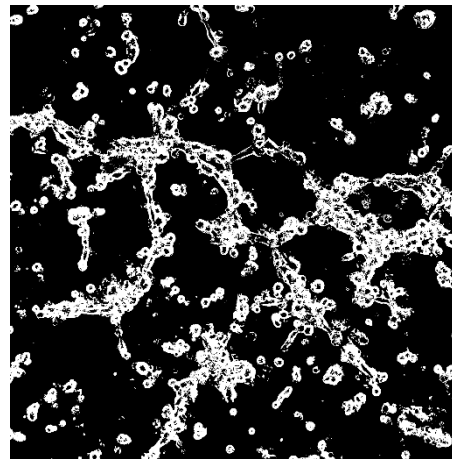

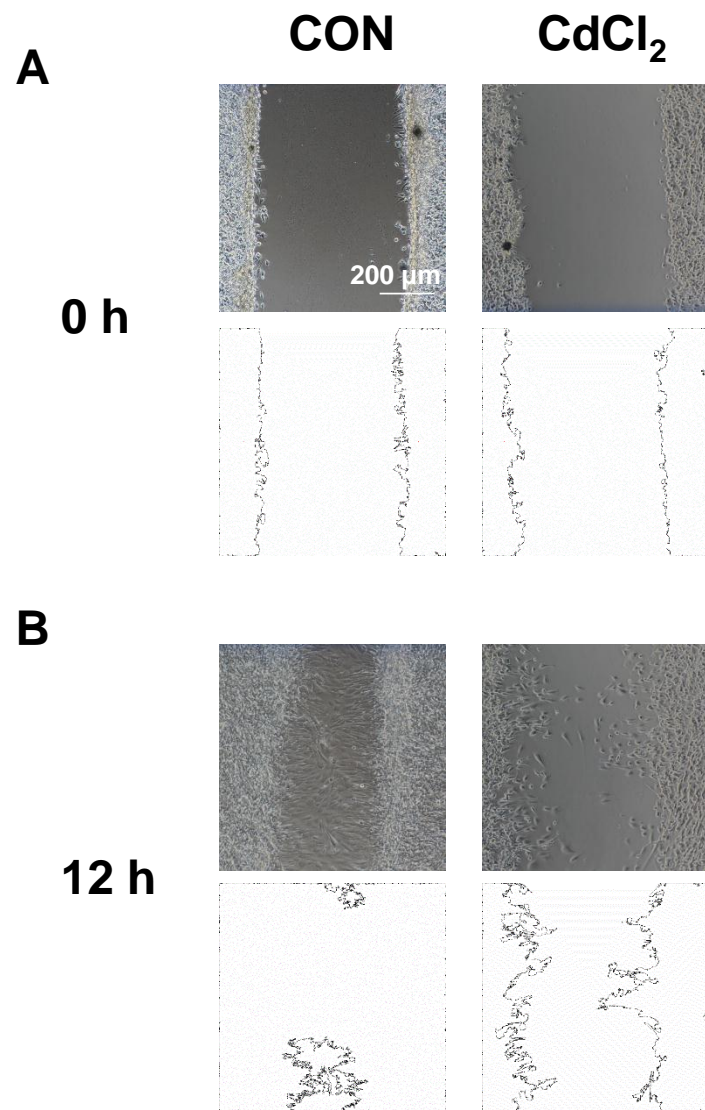



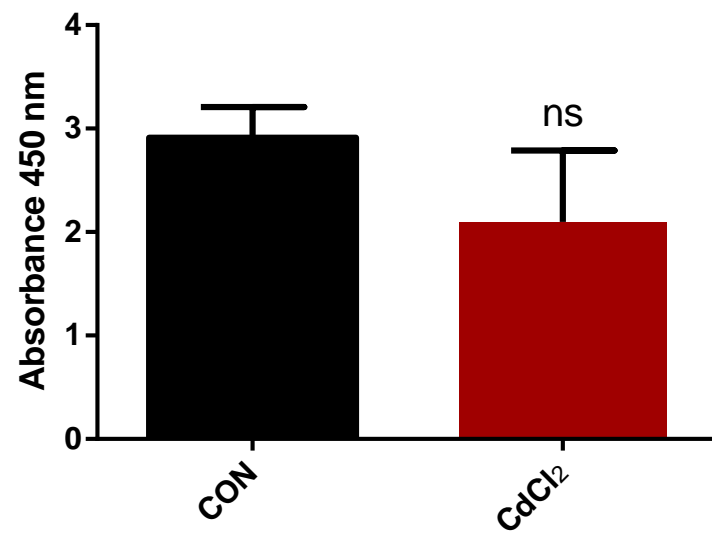

## Most Enriched GO Results of Three Ontologies

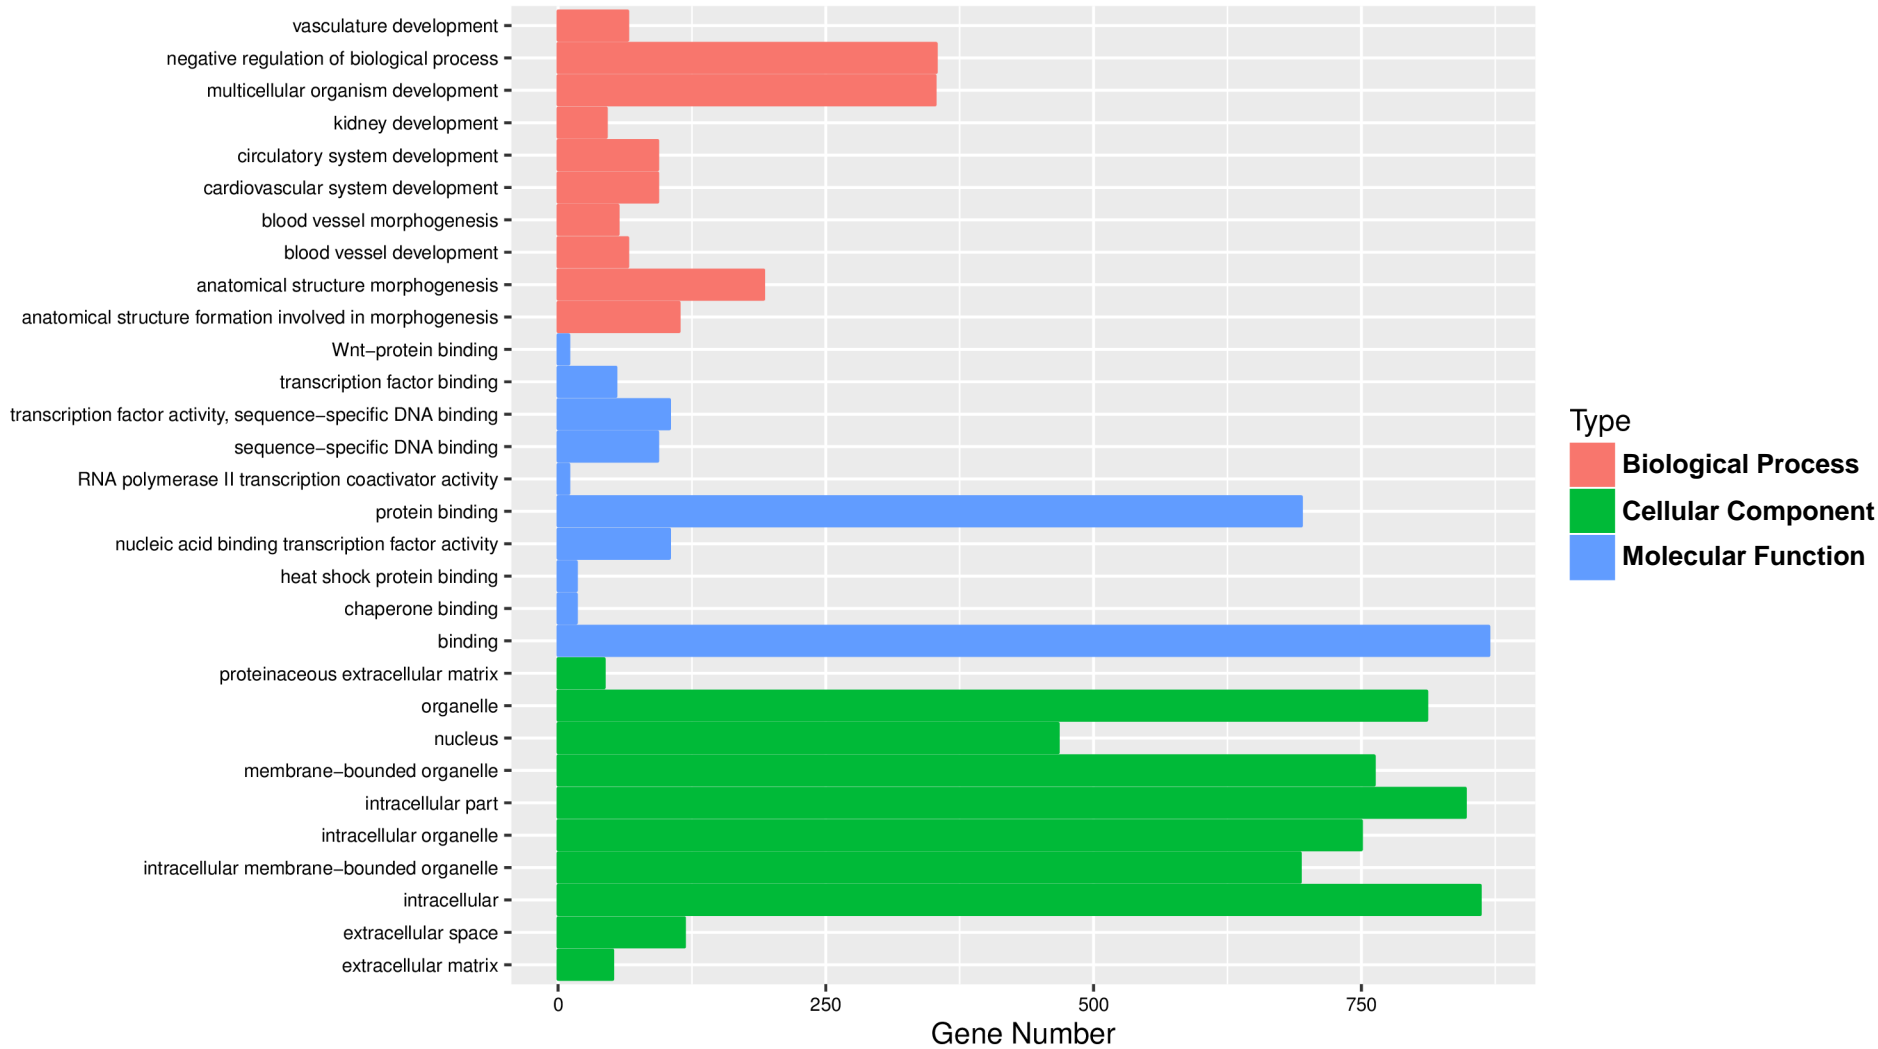

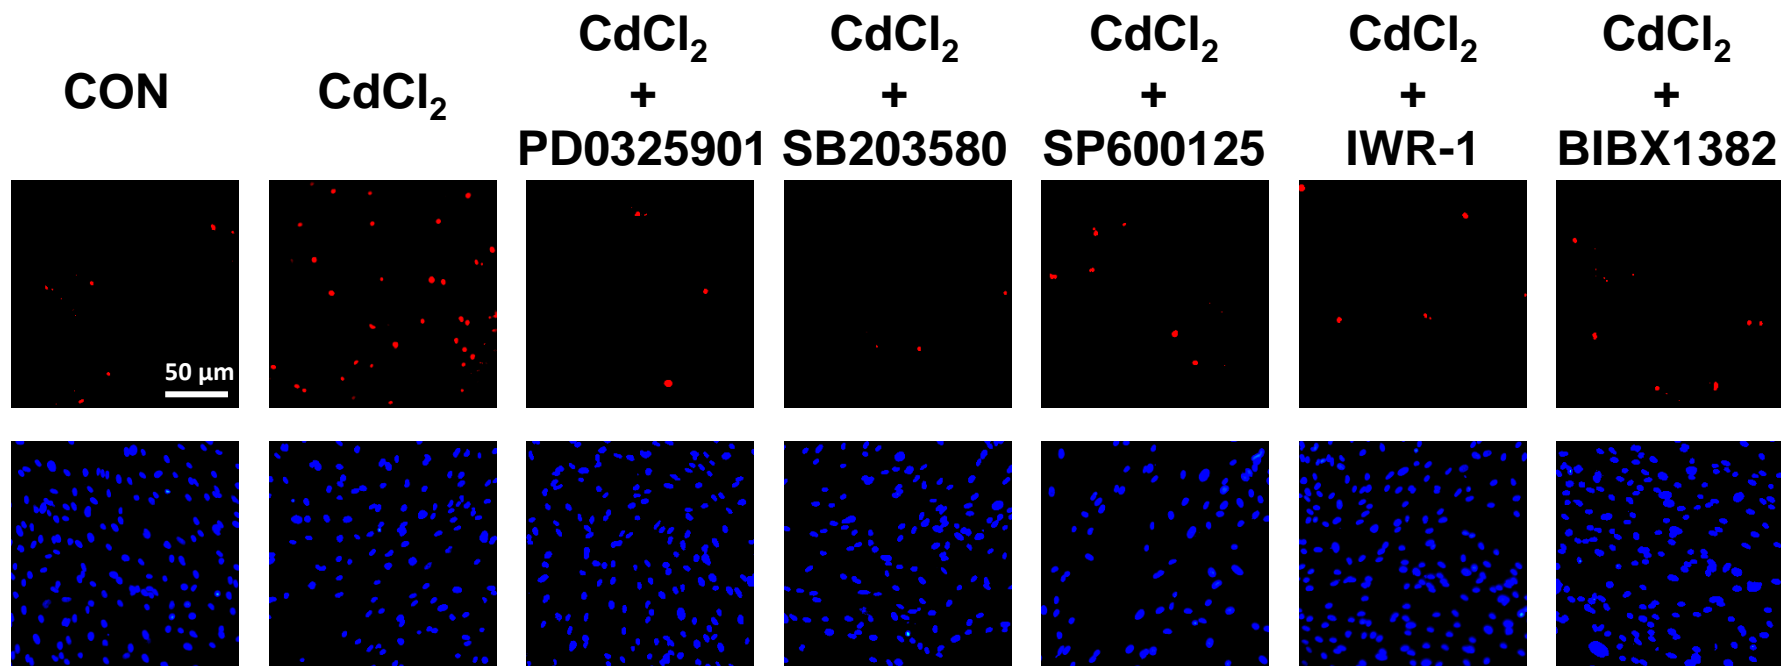

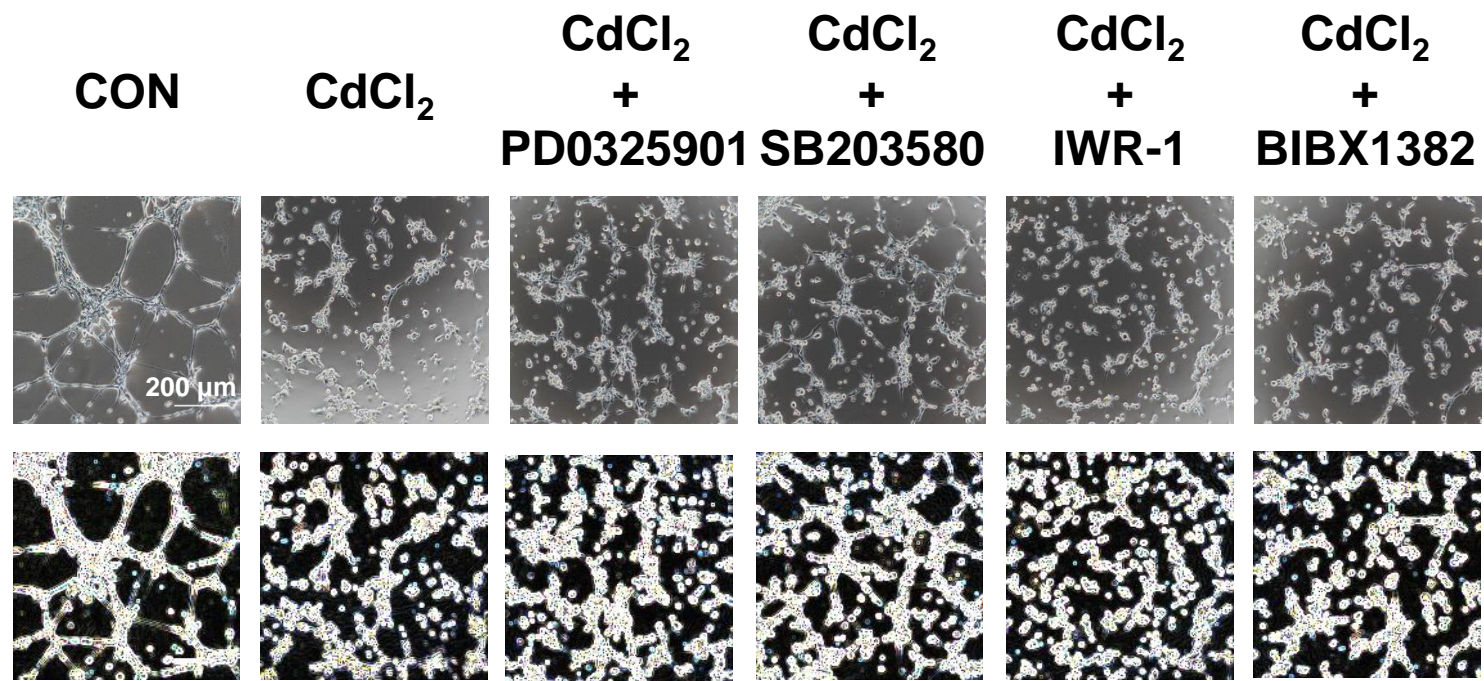

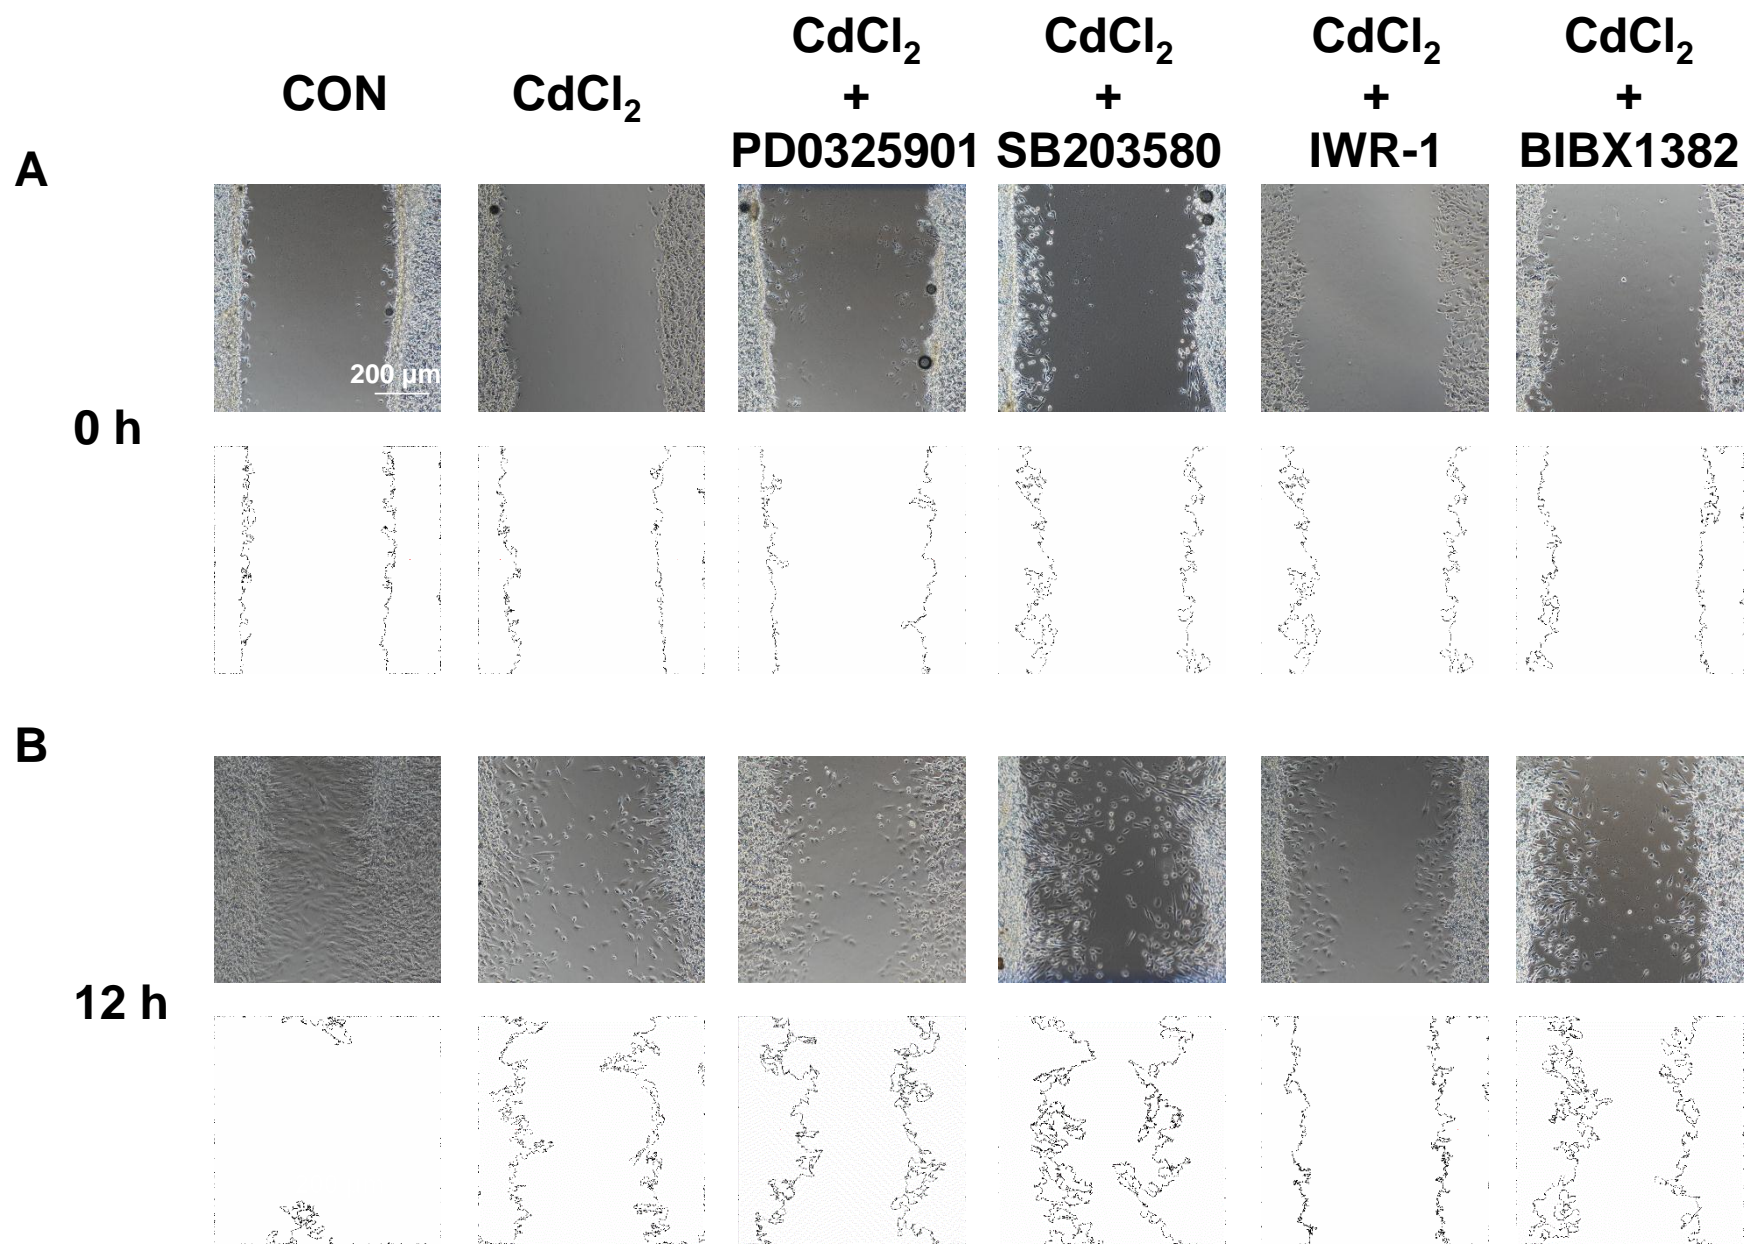

Supplemental Figure 17

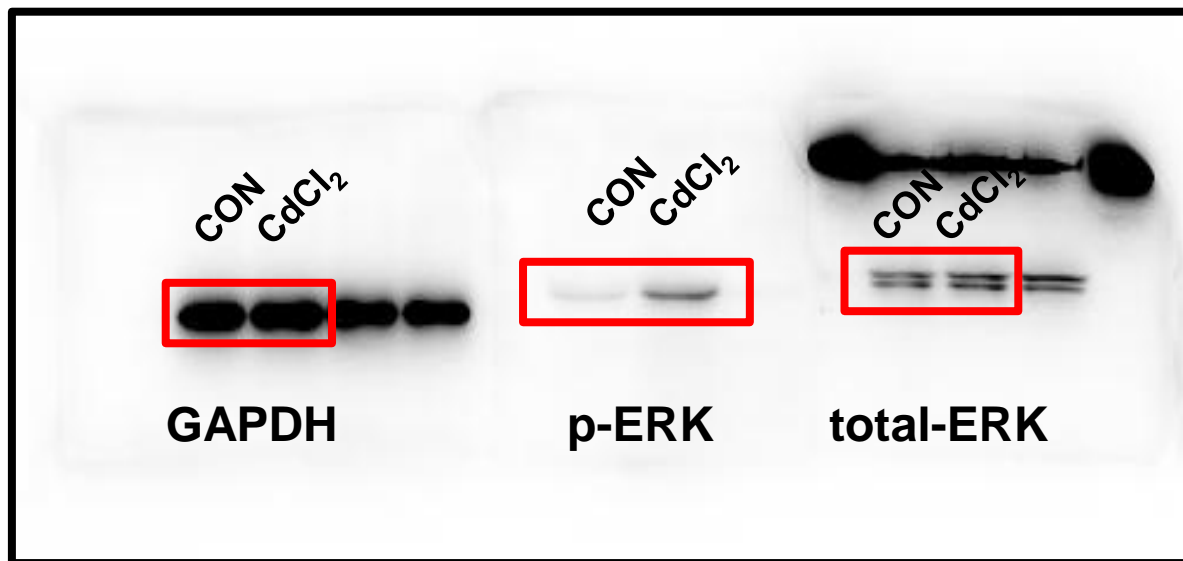

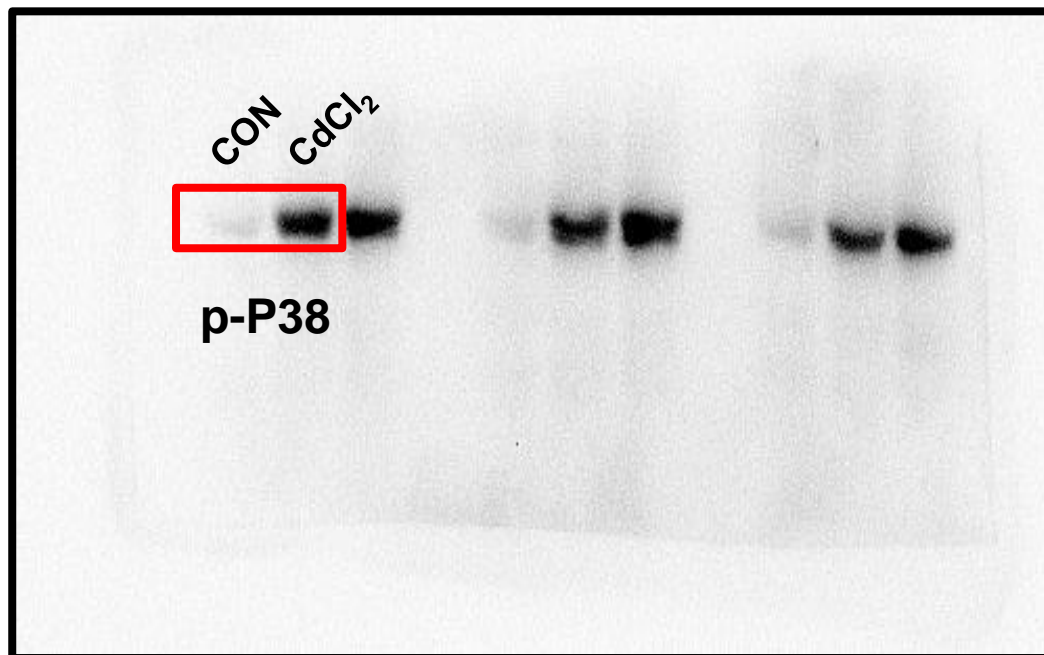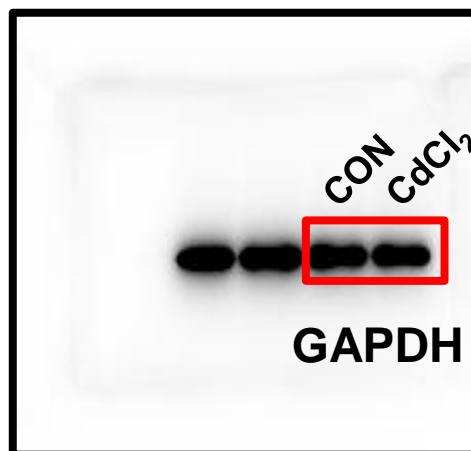

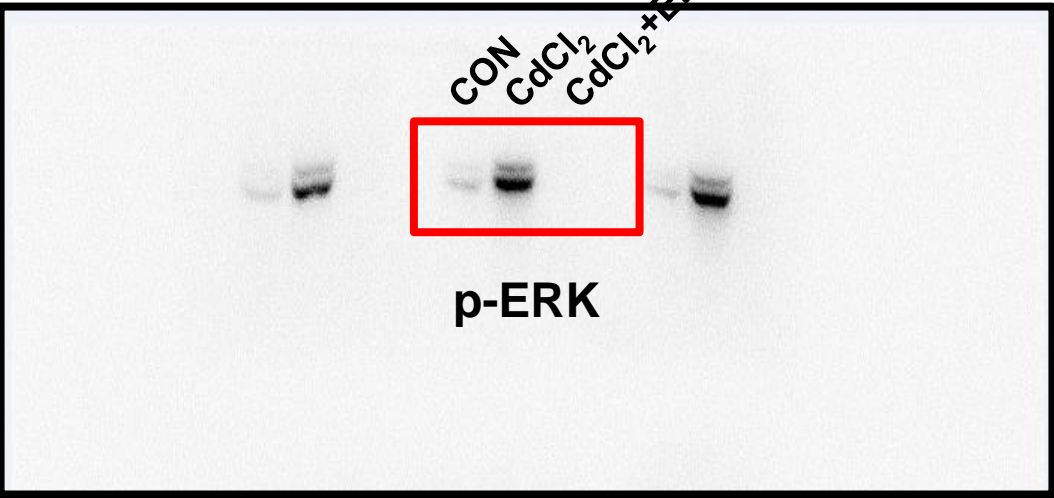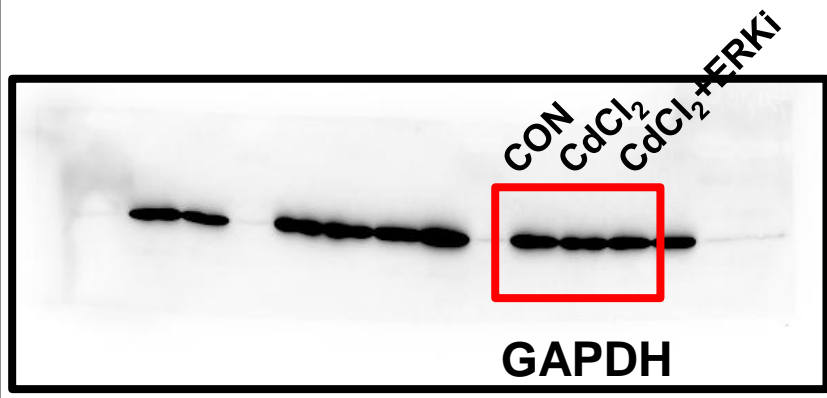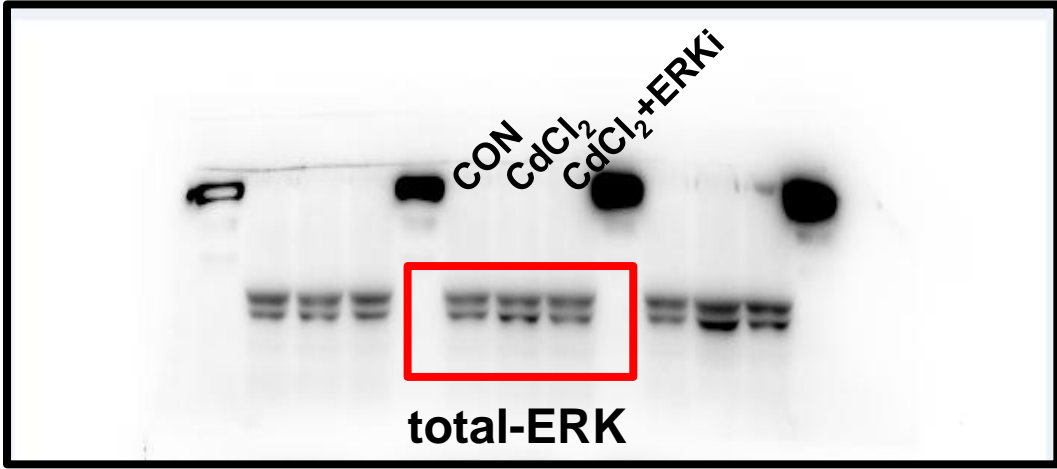



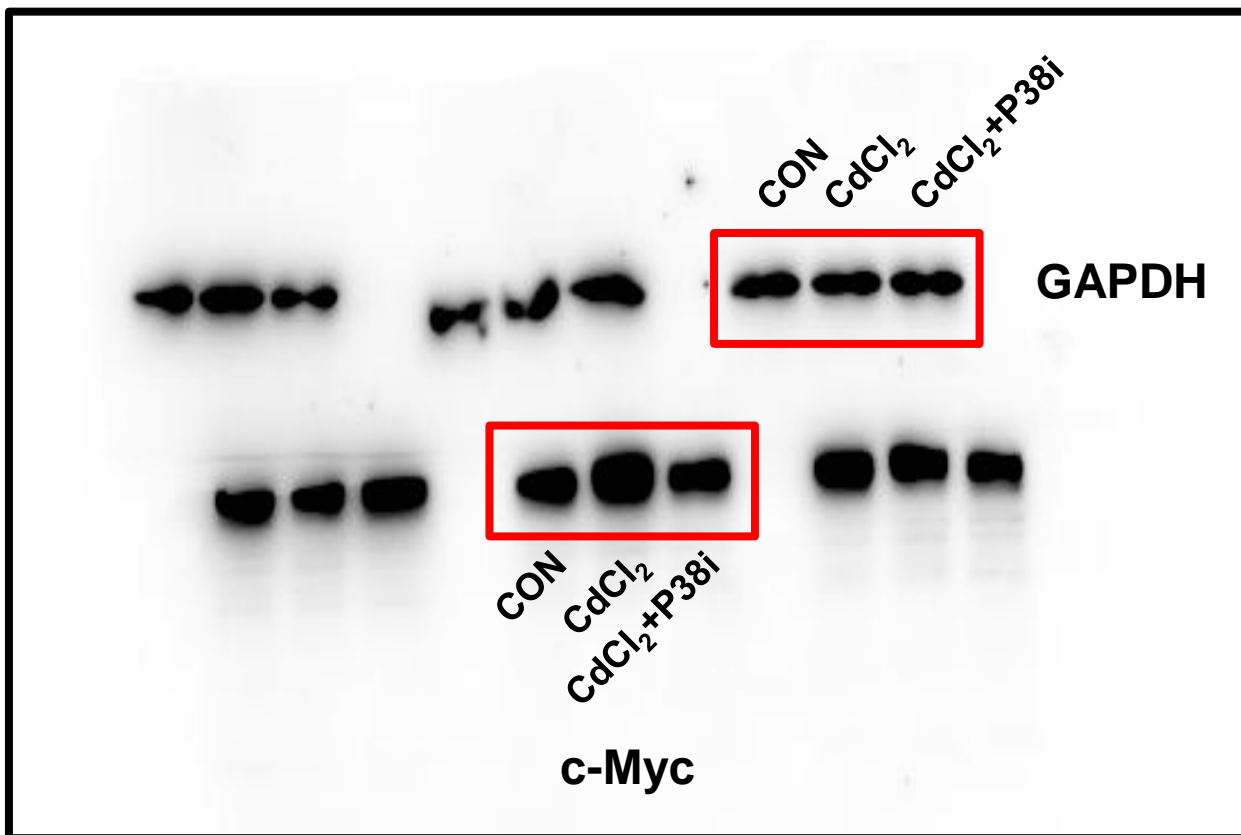

Supplement: 41598_2017_13694_MOESM1_ESM.pdf [file 41598_2017_13694_MOESM1_ESM.pdf]
